# Supplementary material for: Adaptation of central metabolite pools to variations in growth rate and cultivation conditions in Saccharomyces cerevisiae
Source: Microb Cell Fact. 2021 Mar 9;20:64. doi: 10.1186/s12934-021-01557-8 (PMC7941957; doi:10.1186/s12934-021-01557-8)
Supplement: Supplementary file 5 — Additional file 5: Table S8. t-test of pairwise comparisons (paired, 2-tailed) in Panel A-G in Figure 2. Yellow asterix indicate p < 0.05. [file 12934_2021_1557_MOESM5_ESM.xlsx]

## Sheet: Sheet1
	Supplementary Table S8. t-test of pairwise comparisons (paired, 2-tailed) in Panel A-G in Figure 2. Yellow asterix indicate p< 0.05.
		Panel A Exp. phase				Panel B Stat. phase			Panel C		Panel D LG C-lim					Panel E HG C-lim				Panel F N-lim						Panel G P-lim				Biological replica
		Fru	Suc	Gal		Fru	Suc		Glu		0.05	0.18	0.24	0.3		0.24	0.36	0.42		0.06	0.21	0.26	0.33	0.36		0.06	0.18			Glim0_12	Glim0_18	Glim0_24	Glu_Exp
	G6P	0.00167728	0.0266223	0.00130448		0.00973239	0.0139534		0.0228323		0.00355602	0.379796	0.0624087	0.28822		0.331964	0.0253591	0.352406		0.533556	0.381566	0.501295	0.403202	0.456729		0.157678	0.000814068			0.326446	0.165673	0.143372	0.245738
	F6P	0.0081021	0.0321444	0.00397343		0.0188507	0.0479045		0.106361		0.0114712	0.772798	0.157125	0.117536		0.831662	0.132605	0.9992		0.167736	0.786902	0.756366	0.525025	0.475297								0.577346	0.266848
	F1,6BP	0.0352454	0.164926	7.09816e-05		7.55922e-05	7.62045e-05		7.58269e-05		0.0132499	0.0335256	0.00726064	0.0853125		0.0189672	0.0155648	7.67742e-05		0.0137108	0.00573399	0.0332418	0.0470642	0.0164325		0.90733	0.0250293			0.0101014	0.0189509	0.00402076	0.651378
	DHAP	0.0942922	0.274889	0.000247362		0.000224126	0.000224096		0.000225041		0.00433586	0.0329733	0.0032603	0.0320283		0.0241625	0.0155406	0.000150158		0.00452556	0.00746626	0.0484221	0.0556219	0.0368317		0.928916	0.0299912			0.0116557	0.0197792	0.0133721	0.67081
	2-/3PG	0.302901	0.22678	0.00148184		2.93939e-05	8.36059e-06		0.000123642		0.0167548	0.0119493	0.000852081	0.0553698		0.0259797	0.0321559	0.174355		0.0348923	0.00480458	0.0312115	0.00252045	0.00757903		0.00846491	0.0297073			0.00724842	0.477032	0.369172	0.534642
	PEP	0.470353	0.443603	0.0711418		2.10821e-06	1.80724e-06		0.000309838		0.000316974	0.242279	0.0268682	0.100895		0.068392	0.0136813	0.0776773		0.202119	0.00908542	0.00475115	0.0259701	0.0352088		0.653191	0.0204391			0.797559	0.281173	0.0861088	0.911633
	Pyr	0.177765	0.831081	0.524017		0.00532347	0.00559962		0.00629334		0.158327	0.120351	0.022139	0.307581		0.526767	0.828882	0.00307356		0.396575	0.0041576	0.168998	0.0014165	0.037166		0.000514985	0.0696018			0.0147018	0.72616	0.180594	0.775587
	6PG	8.09641e-05	0.0057764	0.0753118		1.2832e-05	9.46666e-06		1.64408e-05		0.00678743	0.00179812	0.000231428	0.0502411		0.000630634	0.00481111	0.123305		0.491045	0.0763878	0.0273767	0.00864942	0.06626		0.0134578	0.0470157			0.00965828	0.0738658	0.0259793	0.924941
	R5P	0.889482	0.826643	0.522796		0.00779055	0.00835106		0.00795093		0.0233048	5.47857e-05	0.00363325	2.36945e-05		0.0100847	0.00136888	0.000223564		0.0593047	0.00427751	0.00339016	0.0010738	0.0176426		0.355083	0.00336086			0.00185874	0.522292	0.0360248	0.580372
	S7P	0.0483431	0.0974072	0.000840187		0.000108814	0.000186316		0.000113357		0.000215323	0.00956904	0.00102649	0.00823917		0.00403002	0.126794	0.776884		0.0522357	0.0259103	0.0108519	0.000810303	0.0135764		0.0129354	0.00405645			0.00207442	0.0513363	0.108709	0.104385
	PRPP	0.118827	0.83756	0.358025		0.000631833	0.00159838		0.00221679		0.0328892	0.000417214	0.00235261	0.470634		0.0574504	0.118022	0.00174693		0.159525	0.0536084	0.167385	0.0297046	0.180699		0.0250196	0.0321363			0.0186831	0.29465	0.01268	0.830394
	Gal1P																					0.372689										0.966179
	G-/M1P	0.0022996	0.00444824	6.53197e-05		0.0436547	0.046958		0.065108		0.0405262	0.0146256	0.680847	0.344045		0.49531	0.0099222	0.344868		0.00207855	0.00320218	0.072749	0.710428	0.472761		0.177517	0.005279			0.466627	0.0270866	0.0344384	0.437962
	M6P	0.0501001	0.00842509	0.0219169		0.00631131	0.102361		0.560965		0.00281052	0.337884	0.00819638	0.123462		0.326743	0.0431367	0.757482		0.22074	0.0313291	0.231323	0.128379	0.400459		0.376993	0.02134			0.120414	0.330841	0.132444	0.209957
	GØ3P	0.00603043	0.0184358	0.000219656		0.000189408	0.000294849		0.00013124		0.00450368	0.0498502	0.893796	0.00692869		0.578507	0.000947865	1.15701e-05		0.0203771	0.140975	0.134337	0.735316	0.102776		0.113023	0.153743			0.475776	0.0229857	0.688714	0.993808
	UDP-glu	0.0079232	0.0984227	0.000536988		0.000148971	0.000434796		0.00055893		0.195258	0.310394	0.0837149	0.00786575		0.00732058	0.000818681	0.00139764		0.00139238	0.0442782	0.0195436	0.00869384	0.0261865		0.0221846	0.00258041			0.131315	0.108324	0.0289042	0.709698
	UDP-GlcNAc	0.000655696	0.280605	0.000827078		0.000634372	0.00347825		0.000159263		0.222723	0.142292	0.0214613	0.00289002		0.00724382	0.003581	0.00261329		0.590208	0.00461267	0.00994634	0.0286263	0.288667		0.5251	0.000502377			0.0381823	0.000921934	0.200607	0.194187
	DOXP	0.0348069	0.122974	0.134893		0.00234694	0.00248324		0.00241704		3.27785e-05	0.0102787	0.0101208	0.00792748		0.000314275	0.000663182	0.000286639		0.0420073	0.00816927	0.000275543	0.000553625	0.0148681		0.054211	0.0137947			0.159592	0.0500422	0.030933	0.0560369
	Lac	0.75377	0.365818	0.905399		0.415838	0.012589		0.0154203		0.958557	0.559686	0.201455	0.124051		0.282369	0.278958	0.0482454		0.390024	0.212432	0.45262	0.713827	0.225616		0.0469318	0.0690538			0.817863	0.222735	0.178241	0.189639
	2-IPM	0.00480962	0.6207	0.00915377		0.000126252	0.000122221		2.15684e-05		0.000914763	0.00341634	0.00528488	2.81108e-06		6.16971e-06	0.00281549	2.21911e-07		0.0203334	0.000409773	0.00261207	0.00492204	0.000448856		0.0430542	0.000940885			4.8188e-05	0.0335555	0.0502103	0.419639
	IA	0.0308819	0.000103512	0.00733032		0.675401	0.336133		0.902026		0.0995464	0.0104303	0.000653101	0.00130142		0.29505	0.405128	0.0414883		0.22139	0.43061	0.50192	0.181202	0.122213		0.031956	0.590994			0.0269163	0.350353	0.000145234	0.506162
	OHGlu	0.00394858	0.000490886	0.00676111		0.0010746	0.00159581		0.00881424		0.00263256	0.00142656	0.0015321	1.72738e-05		1.97987e-05	0.0290296	4.7081e-05		0.00538844	3.69521e-05	0.029068	0.00753246	0.0140795		0.000218014	0.120042			0.000923164	0.254727	0.0470494	0.394145
	2HG	0.721629	0.160783	0.000522135		0.000698737	0.00120445		0.0287732		0.0158766	0.00379253	0.000236006	0.00284913		0.0582941	0.0432396	0.830521		0.0171362	0.00287703	0.15535	0.00375005	0.0170968		6.65713e-07	0.00655992			0.0230313	0.00567944	0.00391814	0.418132
	Cit	0.105289	0.57984	0.0979084		3.00882e-05	1.96674e-05		1.51037e-05		0.240484	0.0665756	0.00858819	0.00416575		2.85481e-05	0.844727	0.00504761		0.0576208	0.931114	0.431851	0.0913136	0.0504569		0.0112059	0.180612			0.0111445	0.548553	0.906098	0.393144
	ICit	0.000903669	0.00157772	0.106825		0.00263224	8.26982e-05		8.5795e-05		0.0657047	0.00592595	0.00633566	0.131635		0.000101026	0.0282607	0.857719		0.0500974	0.0288646	0.0209277	0.0226822	0.0176734		0.00349799	0.00700477			0.0305632	0.0156642	0.0143417	0.349029
	aKG	0.791816	0.499874	0.0069142		0.308115	0.41392		0.242226		0.000145252	0.254414	0.0125094	0.0658156		0.000370573	0.345568	0.486569		0.616503	0.0282802	0.039968	0.376235	0.267783		0.018004	0.0169398			0.391446	0.0308058	0.0123723	0.209981
	Suc	0.242373	0.629186	0.6864		0.0196632	0.023352		0.0358467		0.000148677	0.0450053	0.0424028	0.129714		0.0469913	0.890693	0.00958491		0.911698	0.00523598	0.0246061	0.114616	0.590195		0.00572336	0.00283429			0.300637	0.0123495	0.281875	0.401634
	Fum	0.00475743	0.386719	0.0316755		5.51753e-06	4.63329e-05		0.000617254		0.000388174	0.557279	0.134357	0.026442		0.640904	0.000136312	0.000125703		0.196857	0.43337	0.254326	0.881077	0.0661284		9.83502e-06	5.00369e-06			0.547056	0.520312	0.421288	0.586889
	Mal	0.000373895	0.0871552	0.000196171		0.000242327	5.48344e-06		0.000514841		0.000760063	0.511043	0.333331	0.0191435		0.38704	0.00229656	0.027921		0.406601	0.0390647	0.0321492	0.0727208	0.587171		2.12482e-05	0.00031939			0.843029	0.343503	0.0487762	0.786884
	Ala	0.0239954	0.00400026	9.72679e-06		3.96266e-05	0.000145766		0.000152145		0.00339122	0.0689057	0.0341166	0.392839		0.00141156	7.90558e-05	0.00228909		0.0905777	0.00176579	0.000147516	0.000645464	0.0243815		0.0547988	0.876633			0.118621	0.317809	0.474276	0.907463
	Arg	0.430381	0.0551092	0.00177325		0.000541984	0.000619868		0.139438		0.00286404	0.00698794	0.000579569	0.000644534		0.000109446	0.00171513	0.000372388		0.175523	0.000184329	0.0710033	0.00200172	0.0124229		7.85542e-05	1.14425e-05			0.00160902	0.0328176	0.00181729	0.757948
	Asn	0.188057	0.0904555	3.23239e-06		1.25259e-05	0.000156411		0.00188618		0.00426133	0.35422	0.213891	0.0459286		0.00121376	1.30567e-06	0.000285724		0.579928	0.179157	0.00193759	7.72807e-05	0.0379836		0.00786173	0.000285578			0.00734477	0.136873	0.727162	0.702051
	Asp	0.288865	0.00996814	0.00687491		0.000666944	6.49768e-05		3.90487e-05		0.00273375	0.0815886	0.00851034	0.00787125		0.00416531	0.00639733	0.00678616		0.190754	0.0433687	0.00380256	0.000511659	0.0435656		0.670499	0.168158			0.0388865	0.67191	0.523856	0.55268
	Gln	0.153604	0.209971	0.001178		0.00107748	0.00132718		0.00182184		0.00255376	0.205684	0.0208946	0.0114962		0.00163538	0.00137293	5.58456e-05		0.0396096	0.499257	0.00106024	0.00140257	0.0298291		0.000132156	8.62212e-07			0.433044	0.173547	0.225122	0.910117
	Glu	0.377317	0.24597	0.000574682		0.00119174	0.000446654		0.000740238		0.00645159	0.260153	0.208632	0.200263		0.719859	0.000483658	0.000886953		0.27515	0.0418206	0.0278721	0.00100216	0.060062		0.0095102	0.00690724			0.715268	0.15715	0.148627	0.764917
	Gly	0.00109603	0.0467173	9.08491e-05		0.000121327	0.000132826		0.000107706		0.000709004	0.00195037	0.000592394	0.0015265		0.00167557	0.000273807	4.7515e-07		0.230219	0.000194532	0.020998	4.16931e-05	0.0267322		0.00214023	0.019455			0.000933255	0.0750156	0.843197	0.768399
	His	8.37779e-05	0.000370047	1.48038e-05		5.89151e-05	0.000940654		0.000317146		0.00033821	0.000707206	7.81678e-05	0.000395542		0.0235103	6.44693e-05	0.0429972		0.469417	0.000712893	0.0475897	0.000933667	0.0307484		0.00291761	0.0995686			0.00029349	0.0188845	0.117467	0.0145346
	Leu	0.022016	0.0047105	0.000115276		0.000110966	0.000221617		8.63231e-05		0.00561271	0.536458	0.960916	0.259039		0.0015196	0.000907314	0.0001387		0.127953	0.0387075	0.00413427	5.15765e-05	0.0365925		0.00319351	0.134138			0.0678318	0.0464314	0.165373	0.789723
	Ile	0.00272377	0.00100457	5.98548e-08		2.16287e-06	1.45353e-06		9.4612e-07		0.00724382	0.9007	0.516484	0.589607		0.00229566	0.00609184	0.000166349		0.359895	0.0034253	8.58618e-05	0.00115978	0.0280531		0.00189219	0.865108			0.0270845	0.0712549	0.215708	0.744703
	Lys	0.0637521	0.0024922	3.66348e-07		2.74034e-07	7.7945e-07		1.54476e-07		0.00793225	0.437816	0.00688856	0.00178551		0.00019654	1.86418e-05	1.94016e-05		0.0987229	0.00580726	0.0138863	0.000632851	0.0186462		5.07123e-05	0.00326672			0.129097	0.33797	0.00949988	0.38395
	Met	0.0514242	0.0192682	1.13482e-06		1.44277e-06	1.02356e-07		9.83168e-07		0.00312155	0.00866756	0.0115459	1.69094e-05		0.000609527	6.93694e-07	0.000114099		0.0366789	0.000782172	0.0370653	1.66696e-07	0.033363		0.00105914	0.0221461			0.013362	0.0683626	0.0562885	0.564005
	Phe	0.142959	0.0759588	1.30074e-05		2.78722e-05	5.45709e-05		5.42084e-05		0.00229113	0.0370436	0.0121084	0.0155376		0.00357502	0.0318755	0.000183058		0.0358694	0.0090604	0.000560115	0.00177824	0.0337867		9.67397e-06	0.570459			0.00224408	0.0525464	0.446828	0.640836
	Pro	0.00527994	0.0844287	0.00499367		5.50883e-07	8.73633e-06		9.74364e-07		0.00244134	0.113664	0.0221196	7.97793e-05		0.000125979	0.00030089	0.00069483		0.532758	0.00133668	0.0307493	0.00118617	0.0259699		0.0098724	0.0352149			0.0427657	0.25268	0.203968	0.416335
	Ser	0.0812041	0.124003	4.17033e-06		4.02739e-05	4.9057e-05		4.33611e-05		0.00124902	0.768124	0.221188	0.0221337		0.00286699	9.6341e-05	0.000130971		0.124611	0.00691284	0.0475013	8.93283e-06	0.0348607		0.00123044	0.0319463			0.0457109	0.0523777	0.103986	0.453259
	Thr	0.00955128	0.427674	2.31184e-05		4.78036e-05	8.74013e-05		7.56466e-05		0.00107446	0.126495	0.0216482	0.000246962		3.02128e-05	2.07346e-05	0.000104125		0.0403485	0.000432326	0.0255469	0.000329466	0.0253936		0.219763	0.451998			0.164178	0.19001	0.106159	0.582297
	Trp	0.393337	0.294531	6.82278e-05		5.54587e-07	4.63233e-05		1.69124e-07		0.00161107	0.0115069	0.00075469	0.00196553		0.0841381	0.00184992	0.0225248		0.431975	0.889848	0.00862551	0.00153293	0.0992241		0.00818847	0.734124			0.00087518	0.0356552	0.812971	0.362252
	Tyr	0.0592509	0.00264897	0.00250701		0.00144292	0.00113246		6.21691e-07		0.00168627	0.000662981	0.000353465	0.00107959		9.63561e-06	9.7045e-05	0.000165803		0.296241	0.0138755	0.00222131	5.07473e-05	0.0430526		4.50673e-05	0.288749			0.00123374	0.0320176	0.57567	0.546669
	Val	0.000676642	0.00128073	8.39378e-06		3.66421e-05	7.49058e-05		0.000104272		0.00238861	0.892035	0.153698	0.00609267		0.879729	0.0229634	0.493241		0.866408	0.0071469	0.000708661	2.46738e-05	0.0386381		0.00537903	0.240008			0.00326701	0.0393413	0.186826	0.78237
	AMP	0.00100973	0.0206568	0.00131913		0.953421	0.161884		0.156578		0.00927484	0.0320894	0.004905	0.357389		0.0660566	0.49912	0.085188		0.385933	0.00221326	0.0142369	0.00242094	0.00425667		0.953412	0.00139236			0.686256	0.0665564	0.361478	0.361706
	ADP	0.0068541	0.0294138	0.00121905		0.701129	0.0430129		0.0495824		0.0040082	0.0595341	0.0133595	0.250953		0.172813	0.367952	0.339753		0.392675	0.00396691	0.00550636	0.00399943	0.0022365		0.87081	0.00404161			0.0866668	0.0688133	0.507734	0.0711783
	ATP	0.00745352	0.408274	0.150319		0.169653	0.0890255		0.0669159		0.0509079	0.0377177	0.0164433	0.59936		0.268905	0.167341	0.998305		0.719109	0.00598886	0.0211989	0.0124675	0.024326		0.139587	0.00492822			0.191911	0.040977	0.276995	0.95696
	GMP	0.0363465	0.0557282	0.00752098		0.0177019	0.0222457		0.0351345		0.0523523	0.844409	0.101619	0.153426		0.5018	0.0575677	0.702677		0.663545	0.00449133	0.000721554	0.0147268	0.0427065		0.372696	0.800642			0.0233592	0.195663	0.0241909	0.509349
	GDP	0.023287	0.127306	0.505738		0.0047222	0.0126211		0.0774063		0.0343476	0.028318	0.00515698	0.267716		0.978658	0.0936235	0.87817		0.353906	0.00702751	0.0203369	0.00569117	0.00238624		0.279902	0.00725351			0.450379	0.0136081	0.378325	0.24937
	GTP	0.0260608	0.173835	0.73713		0.000887134	0.00162991		0.00244713		0.0574363	0.0212124	0.00594241	0.902801		0.0549023	0.429331	0.00153377		0.262441	0.0105239	0.0305003	0.0122862	0.0341038		0.210613	0.0124828			0.0907523	0.0433588	0.835515	0.443747
	CMP	0.00898978	0.0121946	0.00417251		0.00559674	0.690432		0.890453		0.00779326	0.0849148	0.274246	0.0188995		0.0325127	0.0384678	0.103993		0.32353	0.140763	0.0253002	0.00957667	0.0613412		0.71369	0.304498			0.0031025	0.239541	0.16281	0.162703
	CDP	0.0111126	0.0937474	0.844503		0.15891	0.658369		0.155257		0.00153058	0.352344	0.154222	0.0688137		0.238077	0.918015	0.111047		0.343739	0.00276754	0.0318022	0.000448649	0.00116615		0.00264053	0.0066522			0.00348542	0.797397	0.27694	0.123384
	CTP	0.0234786	0.775197	0.0186537		0.303332	0.328789		0.0282705		0.0676284	0.180718	0.31004	0.0407868		0.937171	0.224247	0.00396502		0.352868	0.0155727	0.0221129	0.0242124	0.0898898		0.811094	0.0010364			0.509103	0.123202	0.382875	0.207338
	IMP	0.180195	0.33337	0.0882769		0.013906	0.135228		0.404833		0.00504868	0.403045	0.656811	0.187528		0.942956	0.52672	0.187955		0.356713	0.000749957	0.125059	0.0236584	0.0149013		0.60396	0.797645			0.15647	0.36127	0.0167338	0.017325
	ITP	0.156165	0.770212	0.221209		0.0219964	0.133095		0.0887875		0.392383	0.00488413	0.000836321	0.0633689		0.0495035	0.0106071	0.103901		0.6423	0.01543	0.0139041	0.22646	0.19099		0.772021	0.0230901			0.0995155	0.0473061	0.0105804	0.0345036
	TMP	0.0007059	0.0646656	0.00747609		0.169589	0.343926		0.00355995		0.0329282	0.00993058	0.060431	0.00418759		0.125609	0.000634673	4.24079e-05		0.0555443	0.00937147	0.0134273	0.00563827	0.0487671		0.405795	0.433185			0.0437916	0.801183	0.853653	0.288049
	TDP	0.0222112	0.0106947	0.683411		0.0915359	0.00384163		0.0246639		0.000454387	0.000222011	0.0686811	0.0214977		0.255115	0.046547	0.00122729		0.078153	0.489488	0.565893	0.153132	0.0567029		0.00175731	0.00734089			4.79881e-06	8.44922e-07	0.0104087	0.000301395
	TTP/dTTP	0.00913294	0.172327	0.91005		0.0445637	0.0136774		0.0101534		0.0601837	0.00363402	0.000633703	0.16721		0.00207076	0.00279895	0.00302172		0.359818	0.228859	0.259624	0.132951	0.465473		0.0323406	0.0214445			0.154225	0.0031911	0.0694912	0.00998539
	UMP	0.000260441	0.00666514	0.000485421		0.00037348	0.00152492		9.29109e-05		0.103565	0.641329	0.0606625	0.00258847		0.00462059	0.00123817	0.00182187		0.00227572	0.0104026	0.00959648	0.00382784	0.0096869		0.165595	0.000125664			0.0800591	0.0125575	0.0147869	0.756008
	UDP	0.0323445	0.258005	0.254582		0.042287	0.125755		0.425012		0.00231239	0.922878	0.00826953	0.0223885		0.0784838	0.34392	0.04683		0.857047	0.00211581	0.00636413	0.00103024	0.00266718		0.0182259	0.00313764			0.00722096	0.403318	0.235855	0.161968
	UTP	0.0846699	0.242197	0.0147105		0.104654	0.203424		0.0626557		0.0319936	0.0402469	0.00315072	0.349588		0.0217245	0.751962	0.00700318		0.0914565	0.00656526	0.0199682	0.0190271	0.059786		0.561834	0.00198409			0.0515441	0.109172	0.89484	0.210607
	dAMP	0.732794	0.065027	0.660698		0.133251	0.103004		0.0365398		0.500839	0.2865	0.00742039	0.257139		0.10888	0.0736023	0.0733533		0.24274	0.349913	0.260397	0.188648	0.115514		0.710443	0.382078			0.906083	0.346471	0.708772	0.146176
	dADP	0.0540772	0.198898	0.111952		0.0558905	0.0105359		0.00136374		0.0857122	0.674823	0.0421403	0.00312171		0.0517915	0.0200827	0.00031721		0.58409	0.0239304	0.0193608	9.04775e-05	0.000718708		3.98731e-05	0.729985			0.00398721	0.0563418	0.0440084	0.00219962
	dATP	0.0169164	0.0639802	0.797885		0.0277826	0.0219454		0.000610417		0.0854711	0.0294393	0.00181876	0.175132		0.00180707	0.000285259	4.47567e-05		0.663792	0.00338587	0.00853926	0.00289571	0.00907111		0.0007613	0.205572			0.031871	0.0819302	0.126586	0.518894
	dGMP	0.185173	0.158991	0.085321		0.0817529	0.0801937		0.0706521		0.213512	0.887838	0.356873	0.793678		0.391099	0.764022	0.881113		0.33458	0.347581	0.0359114	0.083237	9.71397e-05		0.453405	0.122014			0.019001	0.383812	0.62395	0.0980375
	dGDP	0.0037306	0.0501649	0.0235057		0.11072	0.823513		0.00937284		0.178567	0.239518	0.0164014	0.0291947		0.020065	0.0540939	0.0031911		0.918312	0.0468849	0.00382202	0.00497142	0.0422633		0.112355	0.342564			0.684867	0.91879	0.398958	0.0052506
	dGTP	0.00637185	0.371899	0.164409		0.272576	0.140082		0.135116		0.0443168	0.0326851	0.0149348	0.543919		0.209509	0.235218	0.892941		0.743173	0.00508583	0.0280849	0.00965717	0.0240361		0.142056	0.00438977			0.22331	0.0357353	0.33211	0.812909
	dIMP	0.217231	0.584409	0.514493		0.360787	0.561247		0.319567		0.590261	0.562485	0.280408	0.00390121		0.0469666	0.0520551	0.00659855		0.776785	0.299031			0.314741		0.117654	0.444491			0.699993	0.91089	0.688251	0.387722
	dCTP	0.0950796	0.383441	0.482653		0.0988845	0.226207		0.0068965		0.0167664	0.0730298	0.0309318	0.194877		0.0358464	0.0283181	0.000977796		0.0693863	0.256324	0.00105909	0.0322931	0.0948414		0.0102135	0.0580133			0.256898	0.0478986	0.827912	0.134687
	dUMP	0.324045	0.325128	0.00274322		0.000914679	0.00115844		0.0013184		0.00110006	2.39571e-05	0.00647137	5.91212e-05		4.99906e-06	0.0270791	0.00450733		1.03702e-06	0.00436303	0.00692699	0.00376622	0.00388151		0.0626022	0.012221			0.0128498	0.535197	0.348725	0.000751878
	dUTP	0.398103	0.38661	0.00196488		0.454302	0.969291		0.169714		0.834359	0.825443	0.075672	0.238549		0.519148		0.36855		0.0180046	0.965727	0.147257	0.162683	0.30749		0.557815	0.499183			0.160231	0.313352	0.822901	0.631379
	% p<0.05	54.6667	32	64		73.3333	72		73.3333		70.6667	46.6667	65.3333	52		54.6667	64	65.3333		22.6667	72	73.3333	72	62.6667		53.3333	60			50.6667	33.3333	29.3333	12
